# Supplementary material for: Initial pH Conditions Shape the Microbial Community Structure of Sewage Sludge in Batch Fermentations for the Improvement of Volatile Fatty Acid Production
Source: MDPI journal article supplement (doi:10.3390/microorganisms10102073), 2022-10-20
Supplement: s1 [file s1]

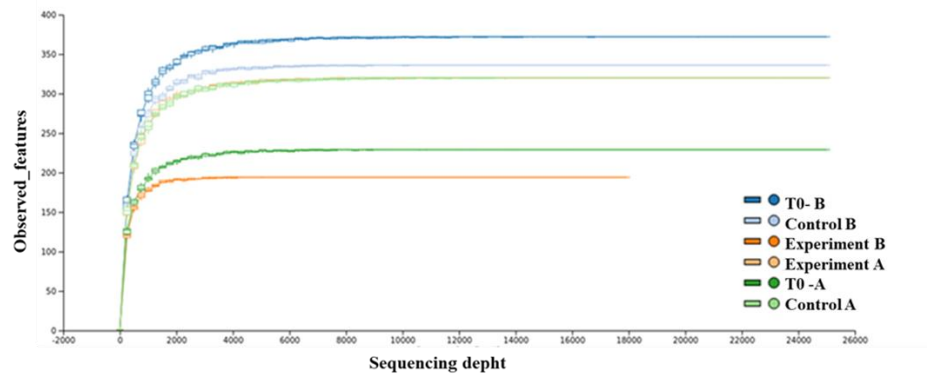

**Figure S1.** Rarefaction curves on sequencing data obtained from different compartments. The number of observed characteristics (representative of the ASVs) found in each sample is reported as a function of the sequencing effort. The asymptotic trend of the curves indicates that the number of readings generated is representative of the entire community.
